# Supplementary material
Source: ML conference proceedings conference paper supplement (https://proceedings.neurips.cc/paper_files/paper/2015/hash/9de6d14fff9806d4bcd1ef555be766cd-Abstract.html)
Supplement: Supplementary file [file 9de6d14fff9806d4bcd1ef555be766cd-Supplemental.zip]

## Appendix: Proofs of Propositions

**Proposition 1** (Correctness) The likelihood maximization problem as defined in Eq. 1 with the mixture models as given in Fig. 1 is equivalent to the problem of solving the original l-POMDP<sub>*i,l*</sub> of discounted infinite horizon whose solution assumes the form of a finite state controller.

*Proof.* Let  $z_i^{0:T} = \{s^t, a_i^t, m_{-i,l-1}^t, a_{-i}^t, o_i^t, o_{-i}^t\}_0^T$ , where  $o_i^0$  and  $o_{-i}^0$  are null. Equation 1 maximizes the following likelihood:

$$\begin{aligned} L(\pi_{i,l}) &= (1 - \gamma) \sum_{T=0}^{\infty} \gamma^T Pr(r_i^T = 1 | T; \pi_{i,l}) \\ &= (1 - \gamma) \sum_{T=0}^{\infty} \gamma^T \sum_{z_i^{0:T}} Pr(r_i^T = 1, z_i^{0:T} | T; \pi_{i,l}) \\ &= (1 - \gamma) \sum_{T=0}^{\infty} \gamma^T \sum_{z_i^{0:T}} Pr(r_i^T = 1 | z_i^{0:T}, T; \pi_{i,l}) Pr(z_i^{0:T} | T; \pi_{i,l}) \\ &\propto \sum_{T=0}^{\infty} \gamma^T \sum_{z_i^{0:T}} \gamma^T R_i(s^T, a_i^T, a_{-i}^T) Pr(z_i^{0:T} | T; \pi_{i,l}) \\ &\propto \sum_{T=0}^{\infty} \gamma^T E_{z_i^{0:T}} [R_i(s^T, a_i^T, a_{-i}^T) | \pi_{i,l}] \end{aligned}$$

The infinite-horizon value function for l-POMDP<sub>*i,l*</sub> given a FSC,  $\pi_{i,l}$ , is:

$$V_{\pi_{i,l}}(\theta_{i,l}) = \rho(b_{i,l}, a_i^t) + \gamma \sum_{o_i^t} Pr(o_i^t | b_{i,l}^t, a_i^t) V_{\pi_{i,l}}(\theta_{i,l}^t) = \sum_{is} b_{i,l}(is) \alpha_{\pi_{i,l}}(is)$$

where  $is = \langle s, m_{-i,l-1} \rangle$ , and

$$\begin{aligned} \alpha_{\pi_{i,l}}(is) &= E_{a_i, a_{-i}} [R_i(s, a_i, a_{-i}) | \pi_{i,l}] + \gamma E_{s, a_i, m_{-i,l-1}, a_{-i}, o_{-i}, o_i} [\alpha_{\pi_{i,l}}(is) | \pi_{i,l}] \\ &= E_{a_i^0, a_{-i}^0} [R_i(s^0, a_i^0, a_{-i}^0)] + \sum_{T=1}^{\infty} \gamma^T E_{s^{1:T}, a_i^{1:T}, m_{-i,l-1}^{1:T}, a_{-i}^{1:T}, o_{-i}^{1:T}, o_i^{1:T}} [R_i(s^T, a_i^T, a_{-i}^T) | \pi_{i,l}] \\ &= \sum_{T=0}^{\infty} \gamma^T E_{s^{1:T}, a_i^{0:T}, m_{-i,l-1}^{1:T}, a_{-i}^{0:T}, o_{-i}^{0:T}, o_i^{0:T}} [R_i(s^T, a_i^T, a_{-i}^T) | \pi_{i,l}] \end{aligned}$$

Subsequently,

$$\begin{aligned} V_{\pi_{i,l}}(\theta_{i,l}) &= \sum_{is} b_{i,l}(is) \left( \sum_{T=0}^{\infty} \gamma^T E_{s^{1:T}, a_i^{0:T}, m_{-i,l-1}^{1:T}, a_{-i}^{0:T}, o_{-i}^{0:T}, o_i^{0:T}} [R_i(s^T, a_i^T, a_{-i}^T) | \pi_{i,l}] \right) \\ &= \sum_{T=0}^{\infty} \gamma^T E_{s^{0:T}, a_i^{0:T}, m_{-i,l-1}^{0:T}, a_{-i}^{0:T}, o_{-i}^{0:T}, o_i^{0:T}} [R_i(s^T, a_i^T, a_{-i}^T) | \pi_{i,l}] \\ &= \sum_{T=0}^{\infty} \gamma^T E_{z_i^{0:T}} [R_i(s^T, a_i^T, a_{-i}^T) | \pi_{i,l}] \end{aligned}$$

□

Consequently, value function of l-POMDP<sub>*i,l*</sub> is proportional to the likelihood, and maximizing the latter is equivalent to finding the policy with the optimal value function.

**Proposition 2** (Sufficiency) Distributions,  $Pr(a_j^t | s^t)$  across actions,  $a_j^t \in A_j$ , for each state  $s^t$  is sufficient predictive information about the other agent  $j$  over all time steps in order to infer the most likely policy of agent  $i$ . Here,

$Pr(a_j^0 | s^0) = \sum_{m_{j,0}^0} Pr(a_j^0 | m_{j,0}^0) b_{i,1}(m_{j,0} | s^0)$ , and

$Pr(a_j^t | s^t) = \sum_{m_{j,0}^t, o_j^t} Pr(m_{j,0}^t | a_j^{t-1}, o_j^t, m_{j,0}^{t-1}) O_j(s^t, a_j^{t-1}, o_j^t) Pr(a_j^t | m_{j,0}^t)$

*Proof.* Let  $z_i^{0:T} = \{s^t, o_i^t, n_{i,l}^t, a_i^t, m_{j,l-1}^t, o_j^t, a_j^t\}$  be a trajectory consisting of the latent state, agent  $i$ 's FSC node,  $j$ 's hidden model, and both agents' actions and observations. We use it to expand on the likelihood maximization as given in Eq. 1:

$$\begin{aligned} \pi_{i,1}^* &= \arg \max_{\pi_{i,1}} (1 - \gamma) \sum_{T=0}^{\infty} \gamma^T Pr(r_i^T = 1 | T; \pi_{i,1}) \\ &= \arg \max_{\pi_{i,1}} \sum_{T=0}^{\infty} \sum_{z_i^{0:T}} Pr(r_i^T = 1, z_i^{0:T} | T; \pi_{i,1}) \end{aligned}$$

For simplicity of notation, we focus on  $l = 1$  and note that the proof holds inductively for any level,  $l \geq 1$ . Next, we expand the term,  $Pr(r_i^T = 1, z_i^{0:T}|T; \pi_{i,1})$ :

$$\begin{aligned} \sum_{z_i^{0:T}} Pr(r_i^T = 1, z_i^{0:T}|T; \pi_{i,1}) &= \sum_{n_{i,1}^0} \mathcal{V}_i(n_{i,1}^0) \sum_{s^0} b_{i,1}^0(s^0) \sum_{m_{j,0}^0} b_{i,1}^0(m_{j,0}^0|s^0) \\ &\times \sum_{a_i^0} \mathcal{L}_i(n_{i,1}^0, a_i^0) \sum_{a_j^0} Pr(a_j^0|m_{j,0}^0) \prod_{t=1}^T \sum_{s^t} T_i(s^{t-1}, a_i^{t-1}, a_j^{t-1}, s^t) \\ &\times \sum_{o_i^t} O_i(s^t, a_i^{t-1}, a_j^{t-1}, o_i^t) \sum_{n_{i,1}^t} \mathcal{T}_i(n_{i,1}^{t-1}, a_i^{t-1}, o_i^t, n_{i,1}^t) \sum_{a_i^t} \mathcal{L}_i(n_{i,1}^t, a_i^t) \sum_{m_{j,0}^t, o_j^t} Pr(m_{j,0}^t| \\ &a_j^{t-1}, o_j^t, m_{j,0}^{t-1}) O_j(s^t, a_j^{t-1}, o_j^t) \sum_{a_j^t} Pr(a_j^t|m_{j,0}^t) Pr(r_i^T = 1|a_i^T, a_j^T, s^T) \end{aligned}$$

Grouping all terms related to each agent, we get:

$$\begin{aligned} \sum_{z_i^{0:T}} Pr(r_i^T = 1, z_i^{0:T}|T; \pi_{i,1}) &= \sum_{n_{i,1}^0} \mathcal{V}_i(n_{i,1}^0) \sum_{s^0} b_{i,1}^0(s^0) \sum_{a_i^0} \mathcal{L}_i(n_{i,1}^0, a_i^0) \\ &\times \sum_{m_{j,0}^0} b_{i,1}^0(m_{j,0}^0|s^0) \sum_{a_j^0} Pr(a_j^0|m_{j,0}^0) \prod_{t=1}^T \sum_{s^t} T_i(s^{t-1}, a_i^{t-1}, a_j^{t-1}, s^t) \\ &\times \sum_{o_i^t} O_i(s^t, a_i^{t-1}, a_j^{t-1}, o_i^t) \sum_{n_{i,1}^t} \mathcal{T}_i(n_{i,1}^{t-1}, a_i^{t-1}, o_i^t, n_{i,1}^t) \sum_{a_i^t} \mathcal{L}_i(n_{i,1}^t, a_i^t) \sum_{m_{j,0}^t, o_j^t} Pr(m_{j,0}^t| \\ &a_j^{t-1}, o_j^t, m_{j,0}^{t-1}) O_j(s^t, a_j^{t-1}, o_j^t) \sum_{a_j^t} Pr(a_j^t|m_{j,0}^t) Pr(r_i^T = 1|a_i^T, a_j^T, s^T) \\ &= \sum_{n_{i,1}^0} \mathcal{V}_i(n_{i,1}^0) \sum_{s^0} b_{i,1}^0(s^0) \sum_{a_i^0} \mathcal{L}_i(n_{i,1}^0, a_i^0) \sum_{a_j^0} Pr(a_j^0|s^0) \prod_{t=1}^T \sum_{s^t} T_i(s^{t-1}, a_i^{t-1}, a_j^{t-1}, s^t) \\ &\times \sum_{o_i^t} O_i(s^t, a_i^{t-1}, a_j^{t-1}, o_i^t) \sum_{n_{i,1}^t} \mathcal{T}_i(n_{i,1}^{t-1}, a_i^{t-1}, o_i^t, n_{i,1}^t) \sum_{a_i^t} \mathcal{L}_i(n_{i,1}^t, a_i^t) \\ &\times \sum_{m_{j,0}^t, o_j^t} Pr(m_{j,0}^t|a_j^{t-1}, o_j^t, m_{j,0}^{t-1}) O_j(s^t, a_j^{t-1}, o_j^t) \sum_{a_j^t} Pr(a_j^t|m_{j,0}^t) Pr(r_i^T = 1|a_i^T, a_j^T, s^T) \\ &= \sum_{n_{i,1}^0} \mathcal{V}_i(n_{i,1}^0) \sum_{s^0} b_{i,1}^0(s^0) \sum_{a_i^0} \mathcal{L}_i(n_{i,1}^0, a_i^0) \sum_{a_j^0} Pr(a_j^0|s^0) \prod_{t=1}^T \sum_{s^t} T_i(s^{t-1}, a_i^{t-1}, a_j^{t-1}, s^t) \\ &\times \sum_{o_i^t} O_i(s^t, a_i^{t-1}, a_j^{t-1}, o_i^t) \sum_{n_{i,1}^t} \mathcal{T}_i(n_{i,1}^{t-1}, a_i^{t-1}, o_i^t, n_{i,1}^t) \sum_{a_i^t} \mathcal{L}_i(n_{i,1}^t, a_i^t) \\ &\times \sum_{a_j^t} Pr(a_j^t|s^t) Pr(r_i^T = 1|a_i^T, a_j^T, s^T) \end{aligned}$$

where,  $Pr(a_j^0|s^0) = \sum_{m_{j,0}^0} Pr(a_j^0|m_{j,0}^0) b_{i,1}(m_{j,0}^0|s^0)$ , and  $Pr(a_j^t|s^t) = \sum_{m_{j,0}^t, o_j^t} Pr(m_{j,0}^t|a_j^{t-1}, o_j^t, m_{j,0}^{t-1}) O_j(s^t, a_j^{t-1}, o_j^t) Pr(a_j^t|m_{j,0}^t)$ .

In the last equation above, the only distributions pertaining to  $j$  are those over its actions given the state at the initial time step and across time steps up to  $T$ .  $\square$

**Proposition 3** (E-step speed up) Each E-step at level 1 using the forward-backward pass as shown previously results in a net speed up of  $\mathcal{O}((|M||\mathcal{N}_{-i,0}|)^{2K}(|\Omega_{-i}|^K))$  over the formulation that ascribes  $|M|$  FSCs each to  $K$  other agents with each having  $|\mathcal{N}_{-i,0}|$  nodes.

*Proof.* In the  $E$ -step, we compute  $\alpha^t$  and  $\beta^h$ , which are then used in the  $M$ -step. Each of these has complexity,  $\mathcal{O}(T_{max} S^2 |\mathcal{N}_{i,1}|^2)$ , where  $T_{max}$  is a bound on  $T$  in practice. In order to compute  $\hat{\alpha}$  and  $\hat{\beta}$ , we need the transition function of the DBN for given current and next states in the  $E$ -step, which has complexity of  $\mathcal{O}(S^2 |\mathcal{N}_{i,1}|^2 |A_i| |A_{-i}|^K |\Omega_i|)$ , where there are  $K$  other agents in the environment. E-step's net complexity is given by  $\mathcal{O}(S^2 |\mathcal{N}_{i,1}|^2 (T_{max} + |A_i| |A_{-i}|^K |\Omega_i|))$ .

A naive formulation infers an FSC for each of  $|M|$  level 0 models ascribed to  $K$  other agents. Nodes of these controllers are included in the state space of the DBN. The complexity of computing  $\hat{\alpha}$  and  $\hat{\beta}$  is,  $\mathcal{O}(T_{max} S^2 |\mathcal{N}_{i,1}|^2 (|M| |\mathcal{N}_{-i,0}|)^{2K})$ . In order to compute  $\hat{\alpha}$  and  $\hat{\beta}$ , we need the transition function of the Markov model for given current and next states, which has complexity of

$\mathcal{O}(S^2|\mathcal{N}_{i,1}|^2(|M||\mathcal{N}_{-i,0}|)^{2K}|A_i||A_{-i}|^K|\Omega_i||\Omega_{-i}|^K)$ . E-step's net complexity for this approach is,  $\mathcal{O}(S^2|\mathcal{N}_{i,1}|^2(|M||\mathcal{N}_{-i,0}|)^{2K}(T_{max} + |A_i||A_{-i}|^K|\Omega_i||\Omega_{-i}|^K))$ .

The speed up due to our approach is the ratio of the above net complexity of the E-step to the complexity of our E-step:

$$\begin{aligned} \text{Speedup} &= \frac{\mathcal{O}(S^2|\mathcal{N}_{i,1}|^2(|M||\mathcal{N}_{-i,0}|)^{2K}(T_{max} + |A_i||A_{-i}|^K|\Omega_i||\Omega_{-i}|^K))}{\mathcal{O}(S^2|\mathcal{N}_{i,1}|^2(T_{max} + |A_i||A_{-i}|^K|\Omega_i|))} \\ &= \frac{\mathcal{O}(S^2|\mathcal{N}_{i,1}|^2(|M||\mathcal{N}_{-i,0}|)^{2K}T_{max})}{\mathcal{O}(S^2|\mathcal{N}_{i,1}|^2(T_{max} + |A_i||A_{-i}|^K|\Omega_i|))} + \\ &\quad \frac{\mathcal{O}(S^2|\mathcal{N}_{i,1}|^2(|M||\mathcal{N}_{-i,0}|)^{2K}(|A_i||A_{-i}|^K|\Omega_i||\Omega_{-i}|^K))}{\mathcal{O}(S^2|\mathcal{N}_{i,1}|^2(T_{max} + |A_i||A_{-i}|^K|\Omega_i|))} \\ &= \mathcal{O}((|M||\mathcal{N}_{-i,0}|)^{2K}) + \mathcal{O}((|M||\mathcal{N}_{-i,0}|)^{2K}|\Omega_{-i}|^K) \\ &= \mathcal{O}((|M||\mathcal{N}_{-i,0}|)^{2K}|\Omega_{-i}|^K) \end{aligned}$$

□

**Proposition 4** (E-step ratio at level 0) E-steps in the EMs for obtaining  $\phi_{-i,0}$  of  $K$  agents exhibits a ratio of complexity,  $\mathcal{O}(\frac{|\mathcal{N}_{-i,0}|^2}{|M|})$ , compared to the E-steps when  $|M|$  FSCs are obtained for  $K$  agents.

*Proof.* In the  $E$ -step presented in this paper, we compute  $\hat{\alpha}$  and  $\hat{\beta}$  (Eq. 4) first. Each of these has complexity,  $\mathcal{O}(T_{max}S^2|M|^2)$ , where  $T_{max}$  is a bound on  $T$  in practice. In order to compute  $\hat{\alpha}$  and  $\hat{\beta}$ , the transition function of the DBN for given current and next states in the  $E$ -step has a complexity of  $\mathcal{O}(S^2|M|^2|A_{-i}||\Omega_{-i}|)$ . E-step's net complexity is then given by  $\mathcal{O}(S^2|M|^2(T_{max} + |A_{-i}||\Omega_{-i}|))$ . For  $K$  other agents, we perform  $K$  EMs and the net complexity for  $K$  agents is,  $\mathcal{O}(S^2|M|^2K(T_{max} + |A_{-i}||\Omega_{-i}|))$ .

The naive approach iteratively improves a FSC for each level 0 model. The complexity of computing  $\hat{\alpha}$  and  $\hat{\beta}$  in this case is,  $\mathcal{O}(T_{max}S^2|\mathcal{N}_{-i,0}|^2)$ . We need the transition function of the DBN for given current and next states to compute  $\hat{\alpha}$  and  $\hat{\beta}$ , which has complexity of  $\mathcal{O}(S^2|\mathcal{N}_{-i,0}|^2|A_{-i}||\Omega_{-i}|)$ . The net complexity of the E-step is given by,  $\mathcal{O}(S^2|\mathcal{N}_{-i,0}|^2(T_{max} + |A_{-i}||\Omega_{-i}|))$ . For  $K$  agents and  $|M|$  model each, this becomes,  $\mathcal{O}(S^2|\mathcal{N}_{-i,0}|^2|M|K(T_{max} + |A_{-i}||\Omega_{-i}|))$ .

The ratio of the complexity of the naive approach to the one presented in this paper is,

$$\begin{aligned} \text{Ratio} &= \frac{\mathcal{O}(S^2|\mathcal{N}_{-i,0}|^2|M|K(T_{max} + |A_{-i}||\Omega_{-i}|))}{\mathcal{O}(S^2|M|^2K(T_{max} + |A_{-i}||\Omega_{-i}|))} \\ &= \mathcal{O}(\frac{|\mathcal{N}_{-i,0}|^2}{|M|}) \end{aligned}$$

This ratio is typically less than 1 because smaller-sized controllers are preferred while the number of models,  $|M|$ , could get large. □
